# Supplementary material for: Fabrication of Mg-Doped Sargassum Biochar for Phosphate and Ammonium Recovery
Source: MDPI journal article supplement (doi:10.3390/su132212752), 2021-11-18
Supplement: s1 [file s1]

Archive with 1 entries (1 files):
- sustainability-1420849-supplementary.pdf
