# Supplementary figures and images for: Fabrication of Mg-Doped Sargassum Biochar for Phosphate and Ammonium Recovery
Source: MDPI journal article supplement (doi:10.3390/su132212752), 2021-11-18

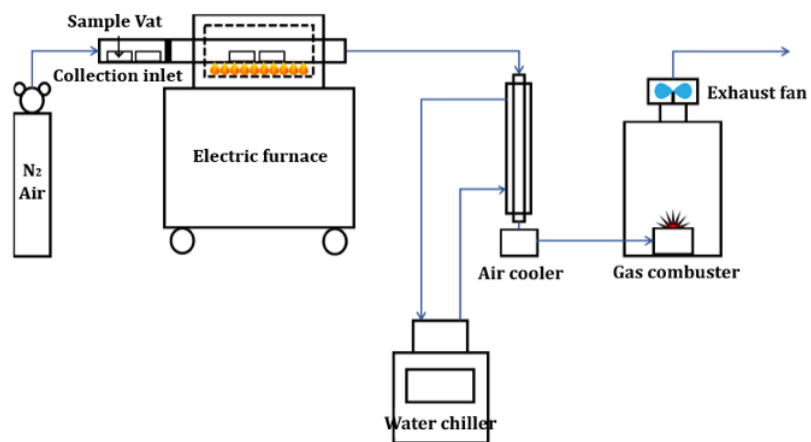

**Figure S1.** Electric furnace system for the pyrolysis experiment.

Supplement: s1 [file s1 › sustainability-1420849-supplementary.pdf]
